# 1 Ethylene impact on grapevine pistil temperature and fruit set

2 Christian Chervin<sup>1</sup> and Olivier Geffroy<sup>2</sup>

3 <sup>1</sup> Université de Toulouse, Laboratoire de Recherches en Sciences Végétales (LRVS),  
4 CNRS/UPS/INP-ENSAT, BP 32607, 31326 Castanet-Tolosan Cedex

5 <sup>2</sup> Université de Toulouse, Physiologie, Pathologie et Génétique Végétales (PPGV), INP-PURPAN,  
6 75 voie du TOEC, BP 57611, 31076 Toulouse Cedex 3

7

## 8 **ABSTRACT**

9 Ethylene is known to stimulate plant respiration, and this later is always associated with heat  
10 generation. The grapevine fruit set is dependent upon pistil temperature, controlling the pollen  
11 germination and ovule fertilization. This led us to test whether ethylene would be able to impact  
12 fruit set often limited in cool climate conditions, particularly in the case of *Vitis vinifera L. cv.*  
13 Malbec, a variety prone to poor fruit set. With this cultivar, we ran trials in growth chambers  
14 using the ethylene gas, and field trials using ethephon as an ethylene precursor. At 14.5 °C  
15 ambient temperature, we observed that ethylene at 1 and 10 ppm increased the stigma and pistil  
16 temperature to 15 °C, compared to 14.7 °C in controls. This minor temperature rise was  
17 associated with an increase of fruit set from 10 to 25 %. The field trials, conducted in the South  
18 West of France, confirmed this trend. Indeed, spraying a concentration as low as 216 mg/ha of  
19 ethephon onto Malbec at full bloom at 16 °C in the shade, led to an increase of fruit set from 35  
20 % to 45 %. These experiments suggest that spraying ultra-low concentrations of ethylene  
21 precursors onto the grapevines prone to poor fruit set, during cool mornings, could improve fruit  
22 set and reduce crop losses.

23

## 24 **KEYWORDS**

25 Ethylene, fruit set, pistil, temperature, ethephon, *Vitis vinifera L.*

26

## 27 **INTRODUCTION**

28 The grapevine yield is obviously linked to flower physiology and good fruit set. For such  
29 development stages, the temperature is critical (Vasconcelos et al., 2009). These authors list  
30 three stages among others, which are particularly sensitive to variations in temperature with a  
31 critical impact on fruit set: (i) the pollen germination, (ii) the pollen tube growth within the style,

32 and (iii) the fertilization of the ovule. The optimal temperatures for such stages are cultivar  
33 dependent, but an optimal range of 20 to 30 °C has been observed (Kozma, 2003). Small  
34 temperature rises, 15.5 to 17.5°C during the flowering time, may lead to major increases in bunch  
35 weight, 48 to 78 g (Vasconcelos et al., 2009). The grape cultivar Malbec, also named Cot, is known  
36 for having poor fruit set (Carrillo et al., 2020), with a fruit set around 20% with morning  
37 temperatures around 10°C and afternoon temperatures around 30°C.

38 The ethylene is a key plant hormone involved in fruit set (An et al., 2020), as it regulates  
39 plant pollination and fertilization processes. It finely modulates the pollen tube growth through  
40 modifications of cell wall and calcium gradient (Althiab-Almasaud et al., 2021). One aspect that  
41 has not been described in the two latter articles is the role of ethylene on organ temperature. In  
42 particular, it is well known that ethylene impairs the energy yield of respiration through the  
43 induction of the alternate oxidase pathway and uncoupling proteins (Wang et al., 2012; Hewitt  
44 and Dhingra, 2020), turning it into a thermogenic process (Moynihan et al., 1995). This respiration  
45 burst generating heat may be part of the plant response to chilling stress.

46 Thus, we studied whether ethylene was able to regulate fruit set by modulating the pistil  
47 temperature, in a controlled cool environment using fruiting cuttings. Then we tested whether  
48 the ethylene precursor, 2-chloroethylphosphonic acid, also called ethephon, was able to improve  
49 fruit set of Malbec clusters in a vineyard during cool mornings.

50

## 51 **MATERIALS AND METHODS**

### 52 **1. Growth chamber trials**

#### 53 **1.1 Growth chamber and fruiting cuttings set-up**

54 The fruiting cuttings were generated as previously detailed (Ollat et al. 1998; Geny et al.,  
55 1998), using Malbec (*Vitis vinifera L.*) clone 595 woods collected at the experimental station of  
56 Institut Français de la Vigne et du Vin, Lisle sur Tarn (South West of France) in February 2019.  
57 Inflorescences on fruiting cuttings (Supplemental Figure S1A) were obtained by sequentially  
58 removing the first appearing leaves to limit the sink competition between vegetative and fruiting  
59 organs (Mullins and Rajasekaran, 1981; Ollat et al., 1998). One particularity of this plantlet model  
60 is that each fruiting bears one single inflorescence. The growing conditions were 17 °C/ 7 °C  
61 day/night for 16 h / 8 h, the day light intensity was 250 +/- 50  $\mu\text{mol m}^{-2} \text{s}^{-1}$ , the relative humidity  
62 was oscillating from 35 to 65 % (day/night). Batches of 6 plantlets were selected for the ethylene

63 treatments as their flowers were between full bloom, stage 23, and 80% caps off, stage 25  
64 (Coombe, 1995) (Supplemental Figure S1B).

### 65 **1.2. Ethylene treatments**

66 The fruiting cuttings were incubated for 1 h at 14.5 °C in four crates as shown in  
67 Supplemental Figure S1C. The temperature was measured inside the crates using thermocouple  
68 thermometers (Votcraft®, PL-120-T1, Conrad, France) over the treatment time. With the  
69 exception of the control treatment, ethylene gas was injected at 0.1, 1 and 10 ppm through the  
70 crate lid, using a hole performed with a hot needle. The ethylene concentration inside the crate  
71 was assayed by sampling gas just after closing, and before opening at the end of the incubation.  
72 The ethylene was measured by gas chromatography using a method previously described (Chen  
73 et al., 2020). A total of 40 Malbec fruiting cuttings were used in order to generate a set of data  
74 representing 4 batches of 10 inflorescences. The crates used for ethylene gassing contained 6  
75 fruiting cuttings (Supplemental Figure S1C), the gassing experiments were repeated two times in  
76 order to treat 12 fruiting cuttings, one inflorescence by cutting. Crates were permuted to limit  
77 position bias. Over the remaining month of berry set and growth, some inflorescences showed  
78 development failure for all the studied treatments as a likely consequence of a bad rooting. Thus,  
79 we finally ended-up with 4 batches of 10 inflorescences, one batch per treatment.

### 80 **1.3. Measurements of pistil temperature**

81 Six fruiting cuttings were randomly chosen among the 12 treated cuttings for each  
82 treatment, and were transferred in front of the camera within 30 min after the crate opening.  
83 Images of each inflorescence were taken using a A325sc thermal camera (FLIR Systems Inc.,  
84 Croissy-Beaubourg, France) equipped with a close-up lens (1 × 100 µm, FLIR Systems Inc.)  
85 immediately after their removal from the crate. The camera had an angular field of view of 25°  
86 and a 320 × 240 microbolometer sensor, sensitive in the temperature range from -20 to 120 °C,  
87 with a thermal sensitivity below 0.05 °C. The distance between the camera and the pistil was 79  
88 mm.

89 The images were analyzed in the following day using the FLIR ResearchIR software  
90 (Supplemental Figure S1D1 and D2). For each chosen inflorescence, three pistils were defined as  
91 regions of interest to determine average temperature and standard deviation, generating 6  
92 batches of 3 pistils. Each batch corresponded to an inflorescence from a different fruiting cutting.  
93 The pistils were chosen according to the quality of picture focus.

94           The fruiting cuttings were then left in the growth chamber for one month, to later assess  
95 the fruit set.

#### 96 **1.4. Fruit set assay**

97           The fruit set is expressed as a percentage of flowers giving rise to a berry, for a chosen  
98 inflorescence. For the growth chamber trial, the number of flowers on one inflorescence were  
99 counted manually on pictures, before the treatment and the number of berries on one cluster  
100 were also counted manually on pictures 30 days after.

101

## 102 **2. Field trials**

### 103 **2.1 Vineyard and experimental set-up**

104           Grapevine trials were set-up in the Cahors area (South West of France) in a private wine  
105 estate growing the Malbec cultivar, clone 598, onto the Riparia Gloire de Montpellier rootstock.  
106 The vines were 20 years old, the plantation density was 5000 vines per hectare. Six blocks of six  
107 vines were randomly spread over an experimental plot of 16 rows of 36 m each. One row was  
108 kept free of treatment between each treated row to prevent spray drift. The treatment took  
109 place in early June 2021, between full bloom and 80% caps off, as described in 1.1, with a morning  
110 temperature of 16°C in the shade. Five inflorescences were tagged (Supplemental Figure S1E) in  
111 each block, thus leading to 30 replicated measurements of fruit set per treatment. The  
112 inflorescence length was measured the day prior the treatments in order to estimate the number  
113 of flowers as explained in 2.2.

### 114 **2.2 Treatments and fruit set assay**

115           Ethephon (Sierra®, Bayer SAS, Lyon, France) was sprayed on the vines at a rate of 110  
116 L/ha, using a Cifarelli backpack mist blower (Supplemental Figure S1F). Ethephon was sprayed at  
117 three various final concentrations after dilution with water: 1.8, 18 and 180 mg/L. Controls were  
118 sprayed with water alone.

119           The percentage of fruit set was measured 30 days later. A regression between  
120 inflorescence length and flower number had been calculated using 25 inflorescences, as  
121 proposed by Ollat (1997), collected on a row adjacent to our experimental plot just before  
122 performing the treatments. At the treatment time, this enables to estimate the number of  
123 flowers by only measuring the length of all inflorescences. Then 30 days after the treatment, the  
124 clusters were sampled and the number of berries was determined manually.

125

### 126 **3. Statistical analyses**

127 Shapiro-Wilk and Brown-Forsythe tests, to estimate distribution normality and variance  
128 homogeneity, respectively, then Student or Welch t-tests to compare means, were performed  
129 using the Sigmaplot software v 14.5 (<https://ritme.com/en/>).

130

## 131 **RESULTS AND DISCUSSION**

### 132 **1. Ethylene treatments increased pistil temperature**

133 As shown in Figure 1, the temperature of the pistils increased up to a maximal value of  
134 15°C that was significantly higher than the control, after one hour of ethylene treatment at 1  
135 ppm in a crate at 14.5°C. The other ethylene treatments also led to an increase in pistil  
136 temperature, although non-significant, but the trend is obvious. Thus, this shows that ethylene  
137 at very low concentrations can increase temperature of a plant organ. This may occur through  
138 the stimulation of the alternative oxidase pathway (Hewitt and Dhingra, 2020; Wang et al., 2012),  
139 but this was not demonstrated here, as our study mainly focused on the effect on fruit set. This  
140 could be a prospect for future studies. Even if the temperature increase due to 1 ppm of ethylene  
141 seems tiny: (+ 0.25°C in comparison to controls), it must be highlighted that this rise is the result  
142 of only one-hour incubation. And Vasconcelos et al. (2009) have shown that + 2°C at full bloom  
143 led to an increase in cluster weight by 40 %. The advantage of thermal camera was the non-  
144 destructive aspect of this measure, which allowed to keep the fruiting cuttings in the growth  
145 chamber to later observe the berries and calculate the fruit set. Additionally, it must be noted  
146 that the temperature rise following ethylene treatments lasted at least 30 min after crate  
147 opening, time to measure the pistil temperature of several inflorescences following a treatment  
148 batch. It would be interesting to further test for how long the pistil temperature rise is observable  
149 after treatment completion. Globally, each fruiting-cutting stood around two hours at 14.5°C  
150 before returning to the growth chamber. As additional experiments, various cold stress  
151 temperatures and durations could be tested.

152

### 153 **2. Ethylene treatments increased fruit set**

154 The Figure 2 shows that the two highest concentrations of ethylene, 1 and 10 ppm,  
155 generated a significant increase in fruit set from 8% to 25%. These percentages are quite low, for  
156 both control and ethylene treated inflorescences, but these are due to several factors. (i) Malbec  
157 is naturally a cultivar with low fruit set percentages (Carillo et al., 2020), (ii) we used cool growing

158 conditions in order to induce poor fruit set, and (iii) fruiting cuttings are known to harbor a fruit  
159 set rate inferior to the rate observed in vineyards (Geny et al., 1998).

160 We cannot be certain that the three-fold increase in fruit set (Figure 2) is only related to  
161 the tiny increase in pistil temperature, as other metabolisms may be activated by ethylene  
162 (Althiab-Almasaud et al., 2021). For example, the ethylene effect on fruit set may involve some  
163 promotion of functional pollen maturation as observed by Völz et al. (2013) and/or increased  
164 fecundation (An et al., 2020). However, as previously shown, a small increase in temperature at  
165 flowering time can generate large increase in cluster weight due to better fruit set (Vasconcelos  
166 et al. (2009).

167 These observations were performed in the growth chamber, in a very controlled  
168 environment, because minimal pistil temperature shifts are easier to measure than in the field.  
169 In outdoor conditions, the thermal camera is harder to operate due to light pollution and wind,  
170 which impact image capture and temperature measurements.

171

### 172 **3. Ultra-low concentrations of ethephon increased fruit set in the vineyard**

173 During a preliminary set of experiments conducted in 2020 (unshown data), we observed  
174 that the optimal ethephon concentrations to test in the vineyard were between 1 and 200 mg/L  
175 in water.

176 The results obtained in the vineyard in 2021 are shown in Figure 3. An ultra-low  
177 concentration of 1.8 mg/L of ethephon led to a significant increase in fruit set rate from 35 % to  
178 45 %. While increasing the ethephon concentration to 18 or 180 mg/L led to increased rate of  
179 fruit set too, but smaller than with 1.8 mg/L and non-significant. Such impact, although it remains  
180 weak in intensity, could lead to a yield enhancement, and have a positive effect on the economic  
181 balance of wine estates. This is particularly true given the expected low cost for this application.  
182 Ethephon is usually applied at a high concentration, approximately 1800 to 3600 mg/L, to  
183 perform chemical thinning (Weaver and Pool, 1971; Ferrara et al., 2016). The ultra-low  
184 concentration usage would allow to cover approximately 1000 hectares with a flask of 1 liter of  
185 commercial ethephon solution at 180 g/L of ethephon.

186 The fact that opposite effects are observed according to the applied ethephon  
187 concentration is not surprising. By “opposite” we mean that low concentrations improve fruit  
188 set, while high concentrations cause thinning. Such response is a classical “hormonal response”

189 with stimulation of a metabolism at low concentration and inhibition of the same metabolism  
190 when the concentration increases (Weyers et al., 1995).

191

## 192 **CONCLUSIONS**

193 We observed that ultra-low concentrations of ethylene, or ethylene precursor, can  
194 improve fruit set rate in cool conditions on Malbec, a cultivar usually leading to poor fruit set.  
195 There were several physiological evidences for this to happen: ethylene is known to boost  
196 alternative oxidase, alternative oxidase is thermogenic, and flower fertilization is temperature  
197 sensitive. However, the direct link between low ethylene concentrations and better fruit set rate  
198 had never been demonstrated. Additional experiments comparing a slight temperature increase  
199 to ethylene gassing could be an interesting test to separate effects by temperature and ethylene.  
200 And the critical period and duration of ethylene exposure could be further tested.

201 Practices such as girdling may improve fruit set (Tyagi et al., 2020 and references herein),  
202 but they are time consuming and not economically adapted for numerous vineyards. Ethylene at  
203 large concentrations is well known to produce chemical thinning (Weaver and Pool, 1971), but  
204 to our knowledge no research was conducted at ultra-low concentration.

205 As previously underlined, we did not decipher the whole process, as we firstly focused on  
206 the main output, that is improving fruit set, but, as outlined in discussion, the possible alternative  
207 targets of ethylene are numerous, from anther and pollen maturation, to pollen tube growth and  
208 pistil effects (An et al., 2019). Thus, decrypting the various metabolisms involved and testing  
209 ultra-low concentrations of ethephon with other cultivars remains an open area of research.  
210 Finally, our observations could lead to new development for ethephon at ultra-low  
211 concentrations.

212

## 213 **Acknowledgements**

214 The authors are thankful to: Nathalie Ollat and Jean-Pierre Petit for their help to set-up the  
215 fruiting cuttings; Lauriane Heissat for the set-up of the growth chamber at the E.I. Purpan;  
216 Maxime Thorin, student at ENSAT, for running the fruit set trial in the vineyard, and Cédric Blanc,  
217 Domaine Lagrezette, for allowing the trials to be performed in the domain vineyard. Thanks to  
218 three anonymous reviewers for their time and fruitful suggestions.

219

220

## 221 References

- 222 An, J., Althiab-Almasaud, R., Bouzayen, M., Zouine, M. Chervin, C. (2019). Auxin and ethylene  
223 regulation of fruit set. *Plant Science*, 292, 110381.  
224 <https://doi.org/10.1016/j.plantsci.2019.110381>
- 225 Althiab-Almasaud, R., Chen, Y., Maza, E., Djari, A., Frasse, F., Mollet, J.C., Mazars, C., Jamet, J.,  
226 Chervin, C. (2021). Ethylene signaling modulates tomato pollen tube growth through  
227 modifications of cell wall remodeling and calcium gradient. *Plant Journal*, 107, 893-908.
- 228 Carrillo, N., Piccoli, P., Bottini, R., Rodríguez, J., Berli, F. (2020). Girdling of shoots at flowering  
229 reduces shatter in grapevine cv. Malbec. *Australian Journal of Grape and Wine Research*,  
230 26, 102–109. <https://doi.org/10.1111/tpj.15353>
- 231 Chen, Y., Althiab Almasaud, R., Carrie, E., Desbrosses, G., Binder, B., Chervin, C. (2020). Ethanol,  
232 at physiological concentrations, affects ethylene sensing in tomato germinating seeds and  
233 seedlings. *Plant Science*, 291, 110368. <https://doi.org/10.1016/j.plantsci.2019.110368>
- 234 Coombe, B.G. (1995). Adoption of a system for identifying grapevine growth stages. *Australian*  
235 *Journal of Grape and Wine Research*, 1, 104-110. [https://doi.org/10.1111/j.1755-](https://doi.org/10.1111/j.1755-0238.1995.tb00086.x)  
236 [0238.1995.tb00086.x](https://doi.org/10.1111/j.1755-0238.1995.tb00086.x)
- 237 Ferrara, G., Mazzeo, A., Matarrese, A.M.S., Pacucci, C., Trani, A., Fidelibus, M.W., Gambacorta,  
238 G. (2016) Ethephon As a Potential Abscission Agent for Table Grapes: Effects on Pre-  
239 Harvest Abscission, Fruit Quality, and Residue. *Frontiers in Plant Science*, 7, 620.  
240 <https://doi.org/10.3389/fpls.2016.00620>
- 241 Geny, L., Ollat, N., Soyer, J.P. (1998). Grapevine fruiting cuttings: validation of an experimental  
242 system to study grapevine physiology. II. Study of grape development. *Journal*  
243 *International des Sciences de la Vigne et du Vin*, 32, 83-90.  
244 <https://doi.org/10.20870/oeno-one.1998.32.2.1052>
- 245 Kozma, P. (2003). Exploration of flower types in grapes. In *Floral Biology, Pollination and*  
246 *Fertilisation in Temperate Zone Fruit Species and Grape*. P. Kozma et al. (eds.), pp. 75-226.  
247 Akademiai Kiado, Budapest.
- 248 Hewitt, S. and Dhingra, A. (2020). Beyond Ethylene: New Insights Regarding the Role of  
249 Alternative Oxidase in the Respiratory Climacteric. *Frontiers in Plant Science*, 11.  
250 <https://www.frontiersin.org/article/10.3389/fpls.2020.543958>
- 251 Moynihan, M.R., Ordentlich, A., Raskin, I. (1995). Chilling-induced heat evolution in plants. *Plant*  
252 *Physiology*, 108, 995-999. <https://doi.org/10.1104/pp.108.3.995>
- 253 Mullins, M.J., Rajasekaran K. (1981). Fruiting Cuttings: Revised Method for Producing Test Plants  
254 of Grapevine Cultivars. *American Journal of Enology and Viticulture*, 32, 35-40.
- 255 Ollat, N., Geny, L., Soyer, J.P. (1998). Grapevine fruiting cuttings: validation of an experimental  
256 system to study grapevine physiology. I. Main vegetative characteristics. *Journal*  
257 *International des Sciences de la Vigne et du Vin*, 32, 1-9. [https://doi.org/10.20870/oeno-](https://doi.org/10.20870/oeno-one.1998.32.1.1061)  
258 [one.1998.32.1.1061](https://doi.org/10.20870/oeno-one.1998.32.1.1061)
- 259 Ollat, N. (1997). Bases physiologiques et anatomiques de la croissance des baies de *Vitis vinifera*  
260 cv. Cabernet sauvignon (Doctoral dissertation, Montpellier, ENSA).
- 261 Tyagia, K., Maoz, I., Lewinsohn, E., Lerno, L., Ebeler, S.E., Lichter, A. (2020). Girdling of table  
262 grapes at fruit set can divert the phenylpropanoid pathway towards accumulation of  
263 proanthocyanidins and change the volatile composition. *Plant Science*, 296, 110495.  
264 <https://doi.org/10.1016/j.plantsci.2020.110495>
- 265 Vasconcelos, M., Greven, M., Winefield, C., Trought, M., Raw, V. (2009). The flowering process of  
266 *Vitis vinifera*: a review. *American Journal of Enology and Viticulture*, 60, 411–434.



- 267 Völz, R., Heydlauff, J., Ripper, D., von Lyncker, L., and Groß-Hardt, R. (2013). Ethylene signaling is  
268 required for synergid degeneration and the establishment of a pollen tube block.  
269 *Developmental Cell* 25, 310–6. <https://doi.org/10.1016/j.devcel.2013.04.001>
- 270 Wang, H., Huang, J., Liang, X. Bi, Y. (2012). Involvement of hydrogen peroxide, calcium, and  
271 ethylene in the induction of the alternative pathway in chilling-stressed Arabidopsis  
272 callus. *Planta*, 235, 53–67. <https://doi.org/10.1007/s00425-011-1488-7>
- 273 Weyers, J.D.B., Paterson, N.W., A'Brook, R., Peng Z.-Y. (1995). Quantitative analysis of the control  
274 of physiological phenomena by plant hormones. *Physiologia Plantarum*, 95, 486-494.  
275 <https://doi.org/10.1111/j.1399-3054.1995.tb00867.x>
- 276  
277  
278

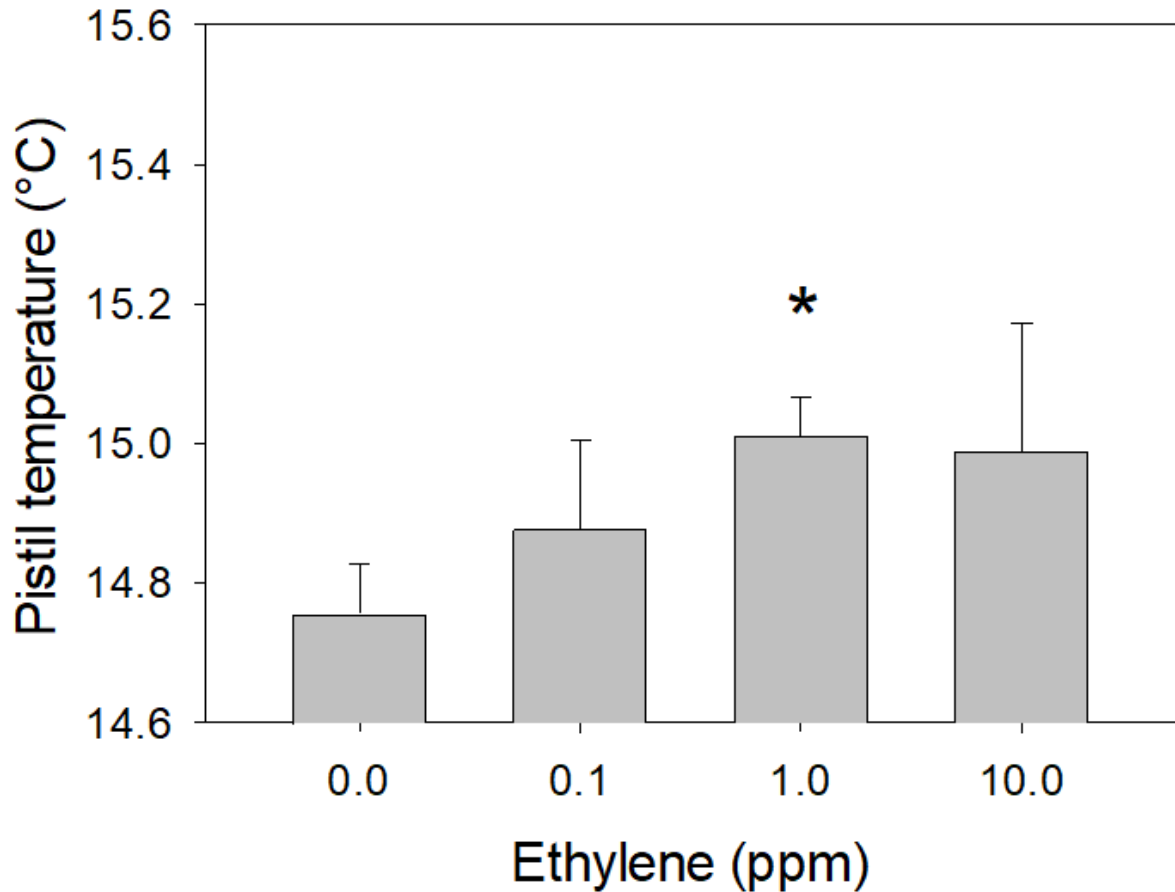

**Figure 1:** Changes in Malbec pistil temperature induced by exposure to exogenous ethylene at various concentrations in the growth chamber.  $n = 6$  batches of 3 pistils, error bars show SE, and the \* shows a significant difference between control and ethylene treated inflorescences by Student's t-test at 5%.

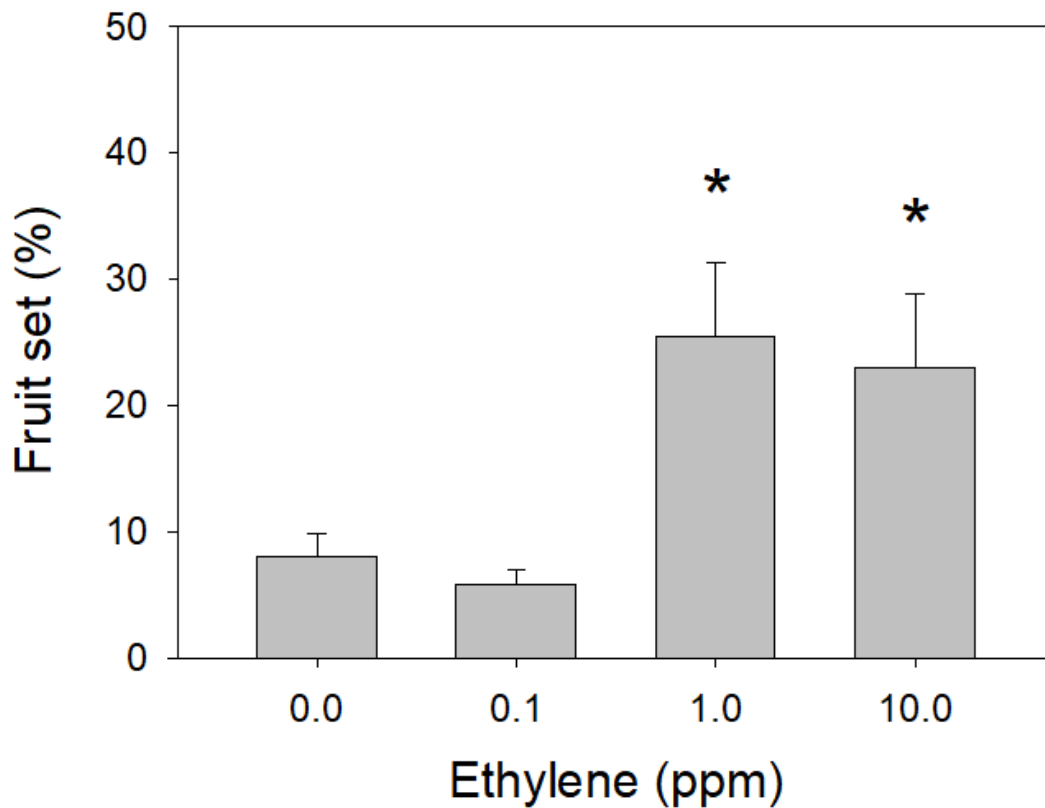

**Figure 2:** Changes in Malbec fruit set rate induced by exposure to exogenous ethylene at various concentrations in the growth chamber.  $n = 4$  batches of 10 inflorescences, each inflorescence on a different fruiting cutting, error bars show SE, and the \* shows a significant difference between control and ethylene treated cuttings by Welch's t-test at 5%.

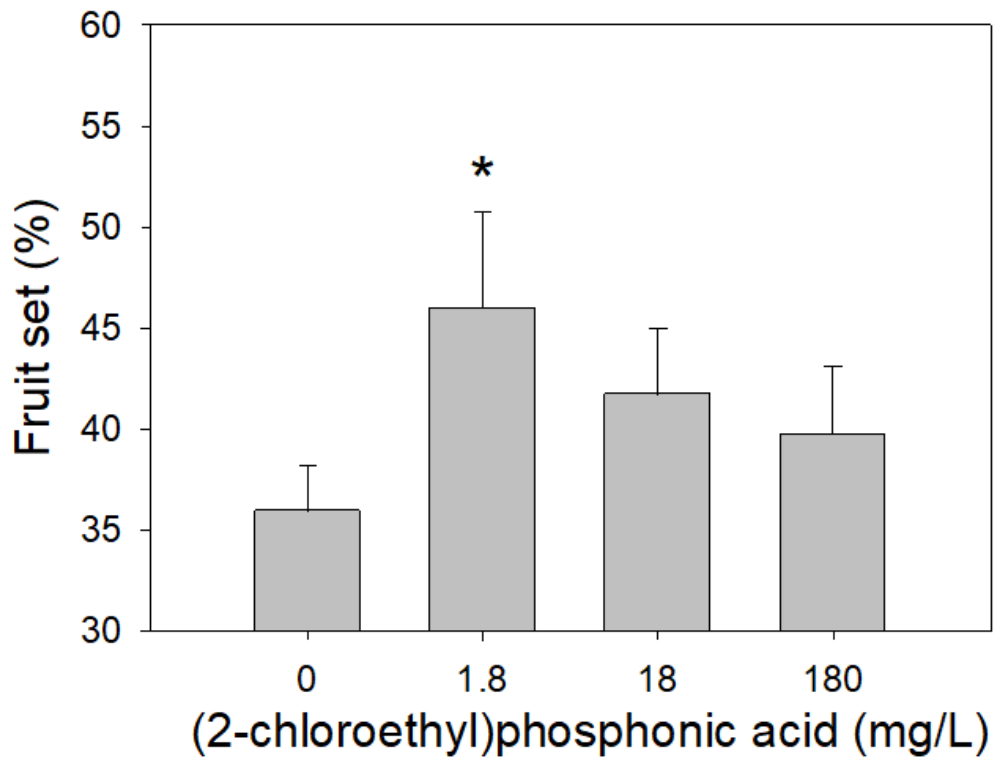

**Figure 3:** Changes in Malbec fruit set rate induced by spraying ethephon (2-chloroethylphosphonic acid) at various concentrations in the field trial.  $n = 30$  inflorescences, each inflorescence on a different grapevine, error bars show SE, and the \* shows a significant difference between control and ethylene treated clusters by Welch's t-test at 5%.

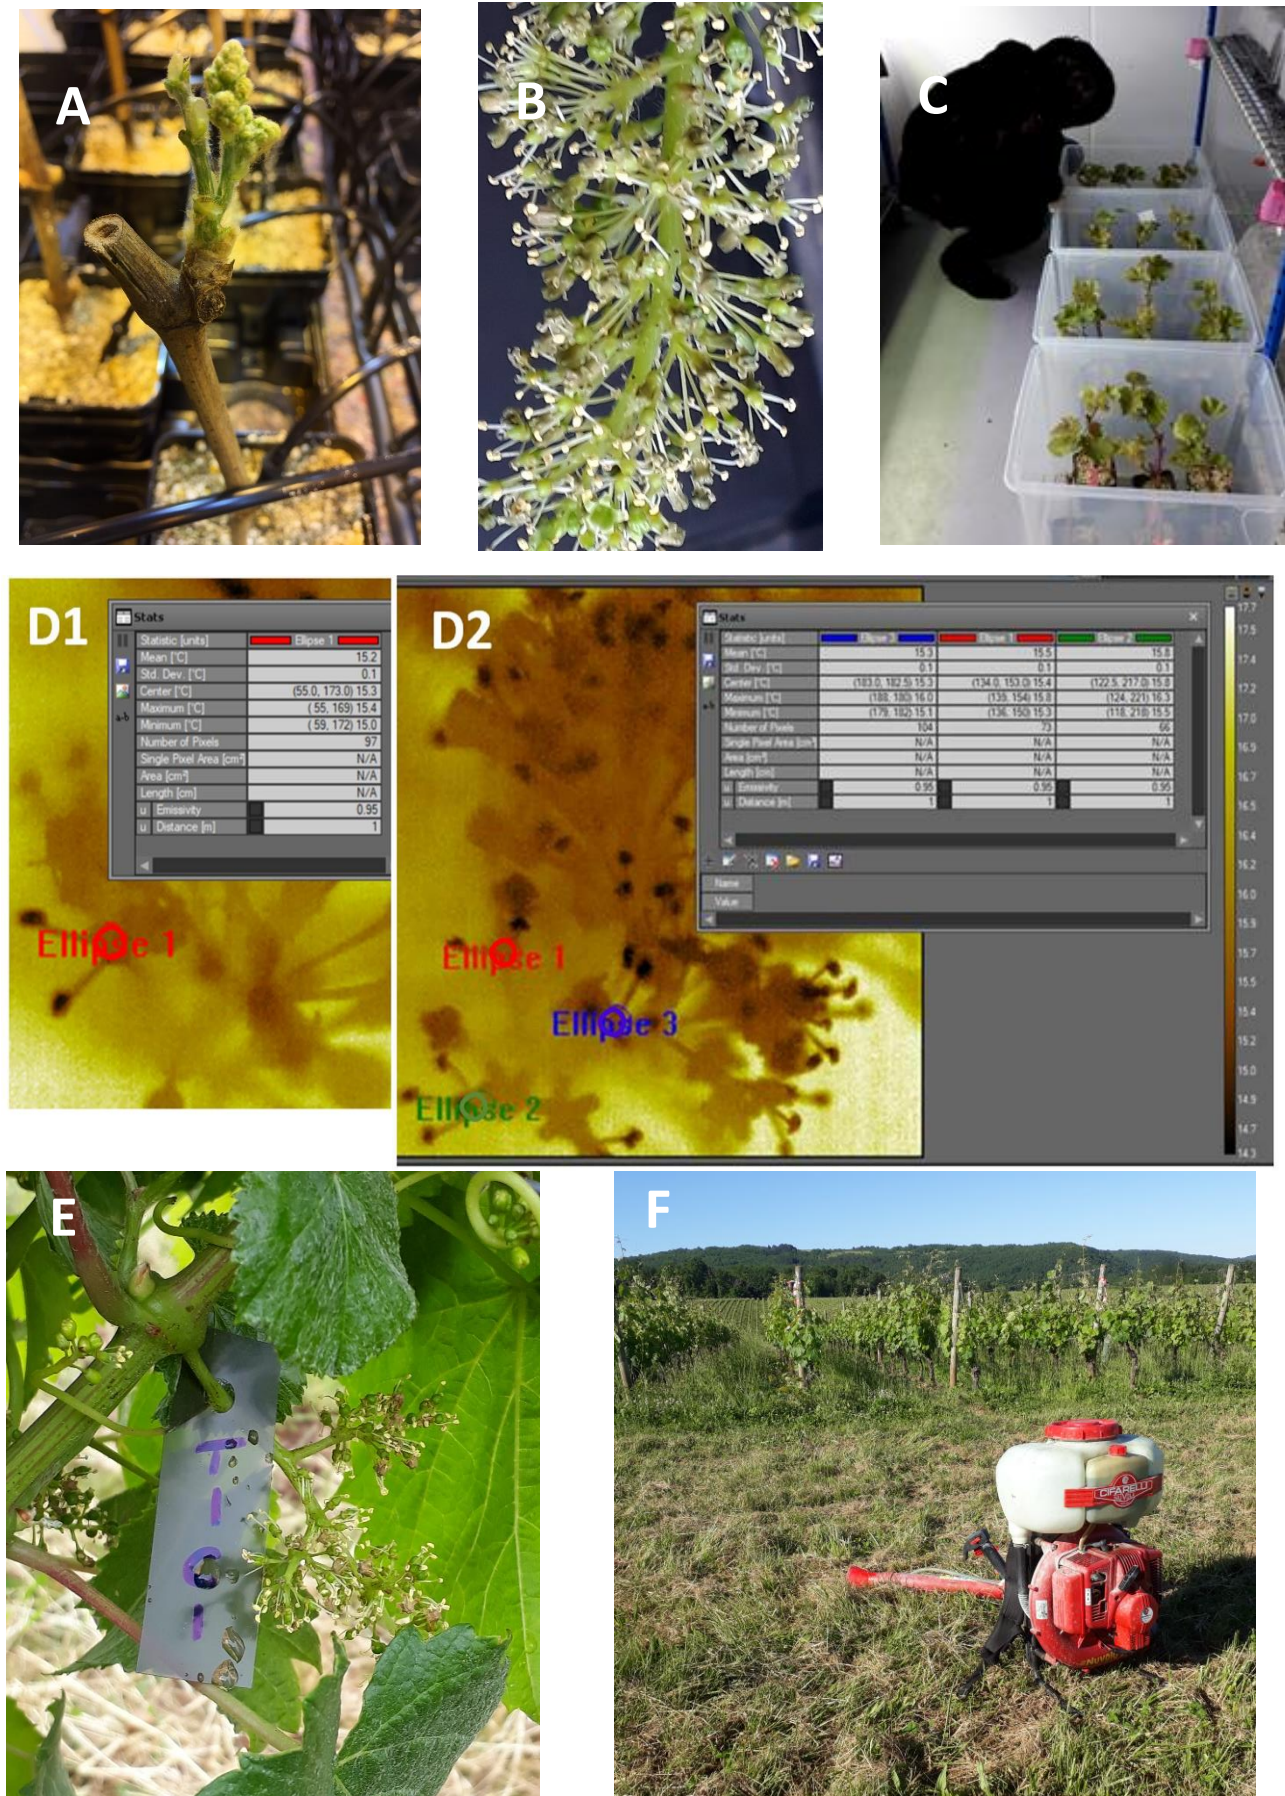

**Supplemental Figure S1** : **A**) Inflorescence of a Malbec fruiting cutting; **B**) inflorescence between full bloom and 80% cap off for ethylene gas treatment, **C**) fruiting cuttings in crates for ethylene gas treatment, **D1 and D2**) IR images of pistils analyzed by the FLIR ResearchIR software, **E**) tagged inflorescence in the vineyard, **F**) mist blower used for spraying ethephon solution
